# Supplementary material for: Tuneable luminescence and morphology of an amphiphilic platinum(ii) complex via the incorporation of a cationic surfactant
Source: Royal Society of Chemistry journal article supplement (doi:10.1039/c6ra14410a), 2016-01-01
Supplement: c6ra14410a1.pdf [file c6ra14410a1.pdf]

# Supporting Information

## Tuneable luminescence and morphology of amphiphilic platinum(II) complex via the incorporation of cationic surfactant

Xiaorui Zheng,<sup>\*a,b</sup> Haiyang Wang,<sup>a,b</sup> Yuan Li,<sup>a,b</sup>

(<sup>a</sup> State Key Laboratory of Fluorine & Nitrogen Chemicals, Xi'an 710065, China; <sup>b</sup> Xi'an Modern Chemistry Research Institute, Xi'an, Shaanxi, China, E-mail: zhxrui@qq.com.)

### 1. Materials and Instruments.

All reagents were used as received and without further purification, or were prepared according to literature procedure. 1, 12-Dibromododecane (95%) and Potassium tert-butoxide (98%) were purchased from J&K, 2-ethoxyethanol and (2, 4-difluorophenyl)boronic acid (98%) were purchased from TCI. The ultrapure water was purified by Aquapro ALH-6000-U.

#### **<sup>1</sup>H NMR Experiments**

<sup>1</sup>H NMR spectra were recorded on a 400 MHz Bruker spectrometer in CDCl<sub>3</sub> solutions, by using Me<sub>4</sub>Si as internal standard. Chemical shifts were reported in ppm downfield from Me<sub>4</sub>Si.

#### **ESI-MS Experiments**

ESI-MS were recorded on a Bruker APEX II Fourier transform ion cyclotron mass spectrometer resonance.

#### **UV-Vis Absorption Spectra Experiments**

UV-vis absorption spectra were recorded by using an Agilent Technologies Cary 60 spectrophotometer.

#### **Emission Spectra Experiments**

Luminescence measurements were made on Edinburgh Edinburgh FLS920 with a xenon lamp as the excitation source and optical filter. Quantum yield was obtained with Edinburgh FLS920 spectrograph using excitation wavelength at 385 nm.

#### **Fluorescence Microscope Experiments**

Fluorescence microscope images were performed with Leica DM4000B. Upon excitation of these mixture systems in aqueous medium at 340-380 nm, fluorescence microscope photos were taken. The samples in aqueous medium were prepared by taking a drop of mixture solution on a glass slide and covered with a cover slip, and the fluorescence microscope photos were collected quickly. The samples at dry state were prepared by taking a drop of mixture solution on a glass slide and dried at room temperature.

#### **SEM Experiments**

A drop of aqueous solution of mixture was placed on a glass slide and dried at room temperature. A conductive cover was coated before the SEM images were collected.

#### **TEM Experiments**

Bright-field TEM images were obtained with a FEI Tecnai F30 operating at 300 kV. A drop of aqueous solution of mixture was placed on a carbon coated copper grid, and dried at room temperature.

## 2. Synthetic route of FPtNC<sub>3</sub> complex

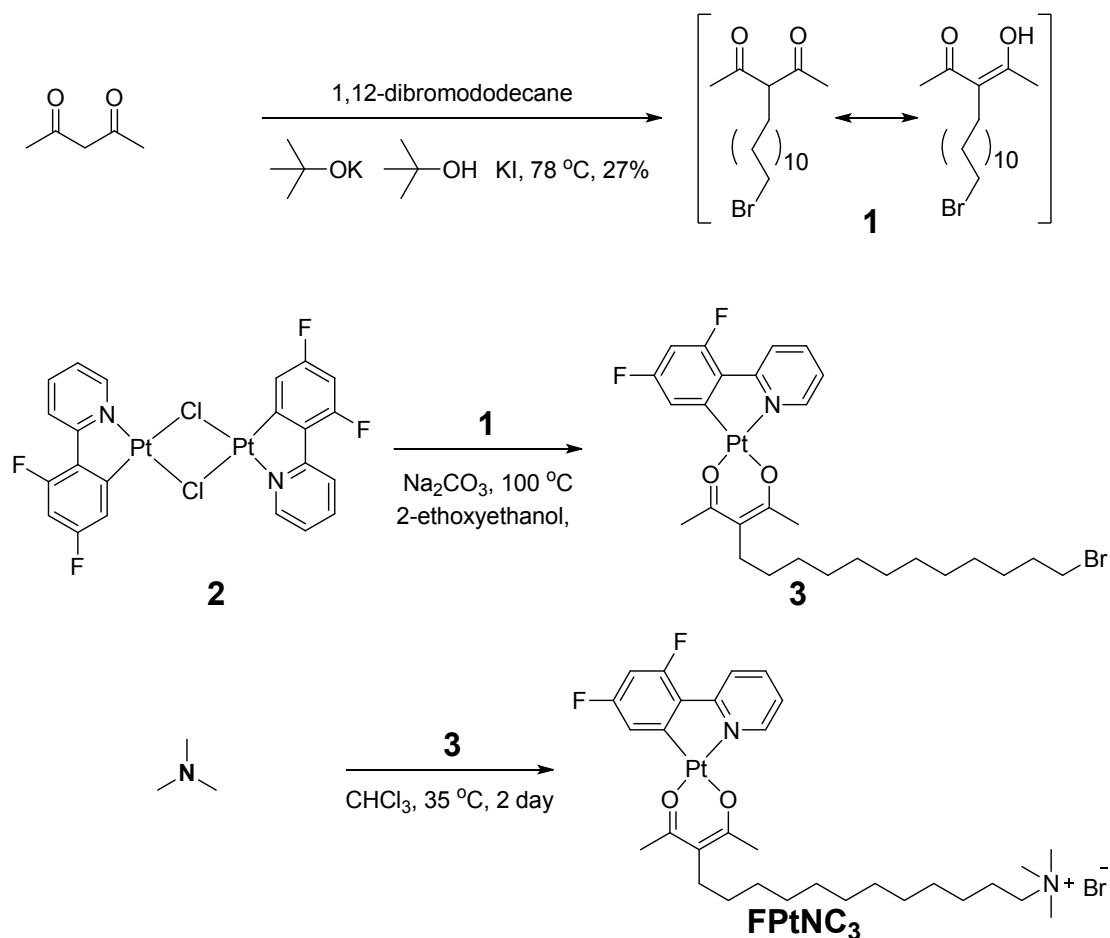

Scheme 1 Synthetic route of FPtNC<sub>3</sub> complex

**1) Synthesis of 1.** A mixture of 1, 12-Dibromododecane (9.84 g, 0.03 mol, 1 eq), Potassium tert-butoxide (3.37 g, 0.03 mol, 1 eq), KI (0.5 g, 0.003 mol, 0.1 eq), were dissolved in tert-Butanol (150 mL) under N<sub>2</sub>. After stirring the solution at room temperature for 5 min, acetylacetone (3.0 g, 0.03 mol, 1 eq) was added slowly over a period of 2 min. Then the reaction mixture was heated to 75°C for 48 h, where complete reaction was observed by thin layer chromatography. After cooling, water was added and washed with CH<sub>2</sub>Cl<sub>2</sub> and dried over anhydrous MgSO<sub>4</sub>, filtered and concentrated. The product was purified using silica gel chromatography (petroleum ether/EtOAc, v/v, 100/1) to give a colourless viscous liquid (27.0 % yield).

<sup>1</sup>H NMR (400 MHz, CDCl<sub>3</sub>, Me<sub>4</sub>Si): δ 16.70 (s, 0.4H, COH enol-form), 3.61 (t, 0.5H, COCHCO, keto-form), 3.41 (t, 2H, J = 7 Hz, CH<sub>2</sub>Br), 2.20-2.23 (m, 1.1H, enol form CH<sub>2</sub>(CH<sub>2</sub>)<sub>11</sub>Br), 2.17 (s, 3H, CH<sub>3</sub>COCHCOCH<sub>3</sub>, keto-form), 2.13 (s, 3H, CH<sub>3</sub>COCHCOCH<sub>3</sub>, enol-form), 1.80-1.89 (m, 1.3H, CHCH<sub>2</sub>(CH<sub>2</sub>)<sub>11</sub>Br, keto-form; 2H, e, CH<sub>2</sub>CH<sub>2</sub>Br), 1.26-1.42 (m, 18H, BrCH<sub>2</sub>CH<sub>2</sub>(CH<sub>2</sub>)<sub>8</sub>).

<sup>13</sup>C NMR (100 MHz, CDCl<sub>3</sub>, Me<sub>4</sub>Si): δ 204.43, 190.82, 110.49, 68.90, 33.95, 32.71, 30.58, 29.50, 29.45, 29.40, 29.31, 29.17, 28.97, 28.64, 28.22, 28.05, 27.49, 27.44, 22.76.

HR-ESI-MS m/z : calcd [C<sub>17</sub>H<sub>32</sub>BrO<sub>2</sub>]<sup>+</sup> : 347.1580; found [C<sub>17</sub>H<sub>32</sub>BrO<sub>2</sub>]<sup>+</sup> : 347.1583.

**2) Synthesis of 2.** **2** was synthesized by the literature methods.<sup>[1]</sup>

**3) Synthesis of 3.** A mixture of **1** (2.5 g, 7.2 mmol, 2.5 eq), **2** (2.4 g, 2.85 mmol, 1 eq), and

Na<sub>2</sub>CO<sub>3</sub> (3.0 g, 28.3 mmol, 10 eq) in 2-ethoxyethanol (50 mL), was sealed under N<sub>2</sub> and heated to 100°C for 16 h. The cooled mixture was diluted in CH<sub>2</sub>Cl<sub>2</sub> and filtered, the solvent was removed under reduced pressure, and the compound was purified by flash chromatography (petroleum ether/dichloromethane, v/v, 10/1). The product was recrystallized with dichloromethane/methanol (20.0% yield).

<sup>1</sup>H NMR (400 MHz, CDCl<sub>3</sub>, Me<sub>4</sub>Si): δ 1.25-1.43 (m, 18H, BrCH<sub>2</sub>CH<sub>2</sub>(CH<sub>2</sub>)<sub>8</sub>), 1.82-1.87 (m, 2H, CH<sub>2</sub>CH<sub>2</sub>Br), 2.14, 2.16 (2s, 6H, CH<sub>3</sub>COCHCOCH<sub>3</sub>), 2.32 (t, J = 8 Hz, 2H, CH<sub>2</sub>(CH<sub>2</sub>)<sub>11</sub>Br), 3.42 and 3.54 (2 × t, J = 8 Hz, 2H, CH<sub>2</sub>Br), 6.53-6.60 (m, 1H), 7.09-7.14 (m, 2H), 7.82 (t, J = 8 Hz, 1H), 7.95 (d, J = 8 Hz, 1H), 8.97 (d, J = 8 Hz, 1H).

<sup>13</sup>C NMR (100 MHz, CDCl<sub>3</sub>, Me<sub>4</sub>Si): δ 184.73, 182.58, 165.15 (d, J = 8 Hz), 161.27, 158.52 (d, J = 13 Hz), 146.98, 144.66, 144.62 (d, J = 8 Hz), 138.42, 128.10 (q, J = 2 Hz), 122.17 (d, J = 18 Hz), 120.91, 112.13, 99.00 (t, J = 27 Hz), 45.21, 34.10, 32.81, 32.63, 30.97, 30.91, 29.90, 29.67, 29.58, 29.52, 29.45, 29.41, 28.87, 28.75, 28.16, 27.58, 26.87, 26.77.

HR-ESI-MS m/z : calcd [C<sub>28</sub>H<sub>36</sub>BrF<sub>2</sub>NO<sub>2</sub>PtNa]<sup>+</sup> : 754.1402; found [C<sub>28</sub>H<sub>36</sub>BrF<sub>2</sub>NO<sub>2</sub>PtNa]<sup>+</sup> : 754.1437.

**4) Synthesis of FPtNC<sub>3</sub>.** Under a nitrogen atmosphere complex **3** (0.26 g, 0.36 mmol, 1 eq) was dissolved in CHCl<sub>3</sub> (7 mL) followed by the addition of trimethylammonium (3.1 g, 17.3 mmol, 46 eq), the reaction mixture was stirred at 35°C for three days. After cooling, the CHCl<sub>3</sub> was removed under reduced pressure, the compound was purified by flash chromatography (petroleum ether/dichloromethane, v/v, 20/1), then was recrystallized by diffusing diethyl ether to **4** in CH<sub>2</sub>Cl<sub>2</sub>/CH<sub>3</sub>OH to get yellow solid (40% yield).

<sup>1</sup>H NMR (400 MHz, CDCl<sub>3</sub>, Me<sub>4</sub>Si): δ 1.25-1.41 (m, 18H, CH<sub>2</sub>(CH<sub>2</sub>)<sub>9</sub>CH<sub>2</sub>CH<sub>2</sub>N<sup>+</sup>), 1.71 (m, 2H, CH<sub>2</sub>CH<sub>2</sub>N<sup>+</sup>(CH<sub>3</sub>)<sub>3</sub>), 2.14 and 2.16 (2s, 6H, CH<sub>3</sub>COCHCOCH<sub>3</sub>), 2.32 (t, J = 8 Hz, 2H, CH<sub>2</sub>(CH<sub>2</sub>)<sub>11</sub>N<sup>+</sup>(CH<sub>3</sub>)<sub>3</sub>), 3.42 (s, 9H, CH<sub>2</sub>N<sup>+</sup>(CH<sub>3</sub>)<sub>3</sub>), 3.54-3.58 (m, 2H, CH<sub>2</sub>N<sup>+</sup>), 6.53-6.59 (m, 1H), 7.07-7.12 (m, 2H), 7.82 (t, J = 8 Hz, 1H), 7.95 (d, J = 8 Hz, 1H), 8.97(d, J = 8 Hz, 1H).

<sup>13</sup>C NMR (100 MHz, CDCl<sub>3</sub>, Me<sub>4</sub>Si): δ 184.58 (s), 182.16 (s), 164.74 (d, J = 6 Hz), 160.95, 160.83, 158.38, 146.74, 144.73, 144.65, 138.27, 128.10 (q, J = 2 Hz), 121.83 (d, J = 7 Hz), 120.85, 111.94, 98.70 (t, J = 27 Hz), 66.63, 53.15, 30.81, 30.73, 29.71, 29.45, 29.34, 29.24, 29.18, 29.04, 27.41, 26.63, 25.94, 23.01.

HR-ESI-MS m/z : calcd [C<sub>31</sub>H<sub>45</sub>F<sub>2</sub>N<sub>2</sub>O<sub>2</sub>Pt]<sup>+</sup>: 710.3094; found [C<sub>31</sub>H<sub>45</sub>F<sub>2</sub>N<sub>2</sub>O<sub>2</sub>Pt]<sup>+</sup>: 710.3093.

### 3. Spectrum Analysis

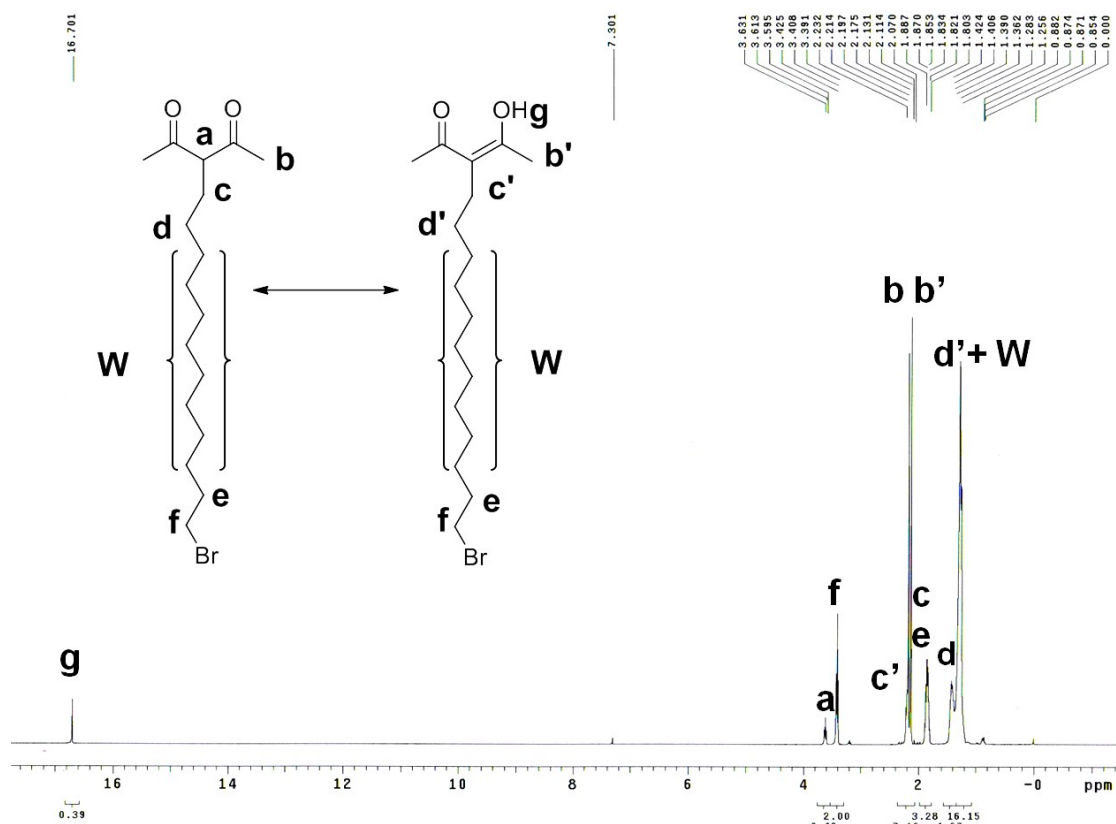

Figure S1 The  $^1\text{H}$  NMR of complex 1

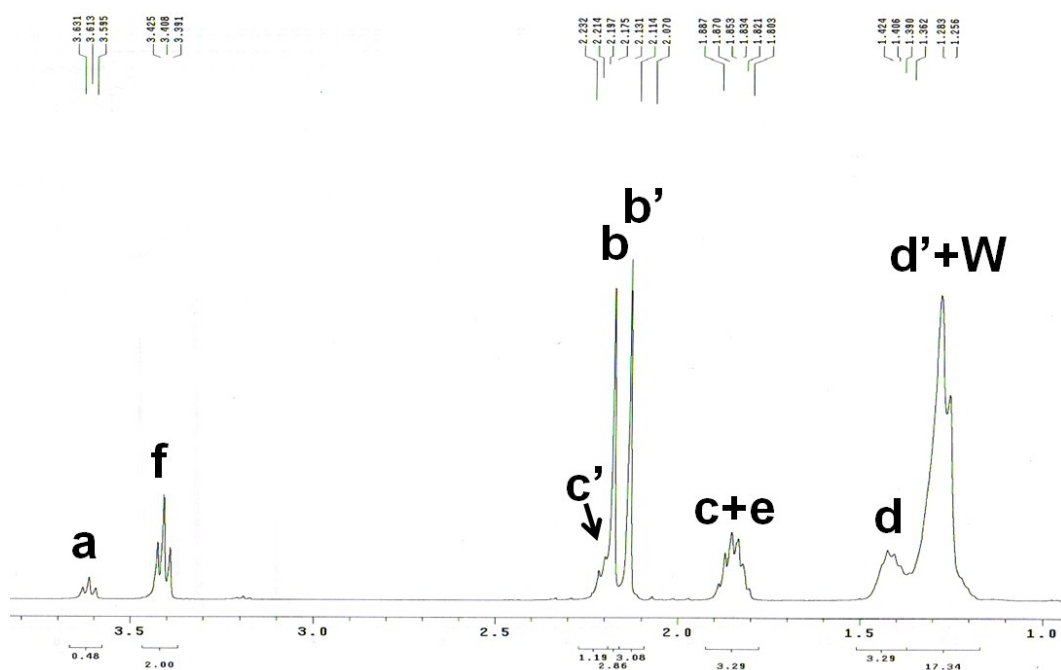

Figure S2 A part of  $^1\text{H}$  NMR of complex 1

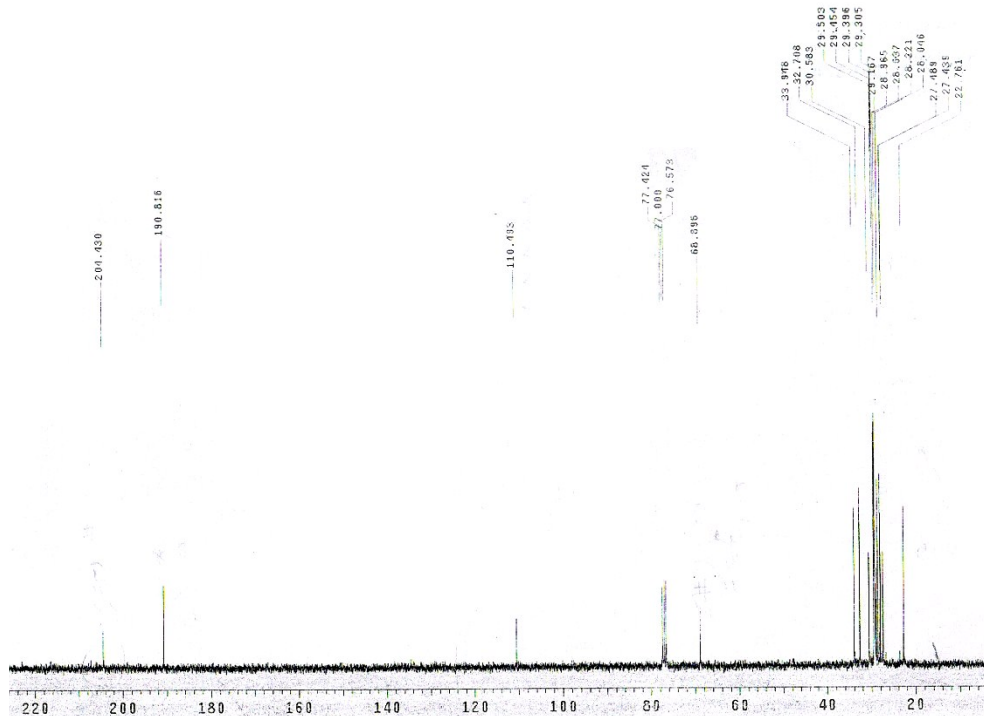

Figure S3 The  $^{13}\text{C}$  NMR of complex 1

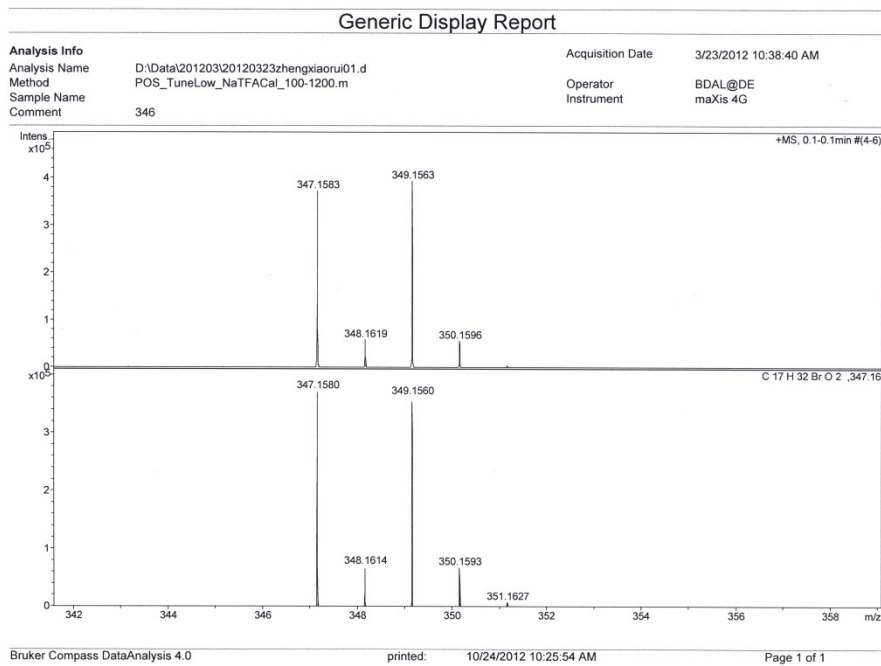

Figure S4 The HR-ESI-MS of complex 1

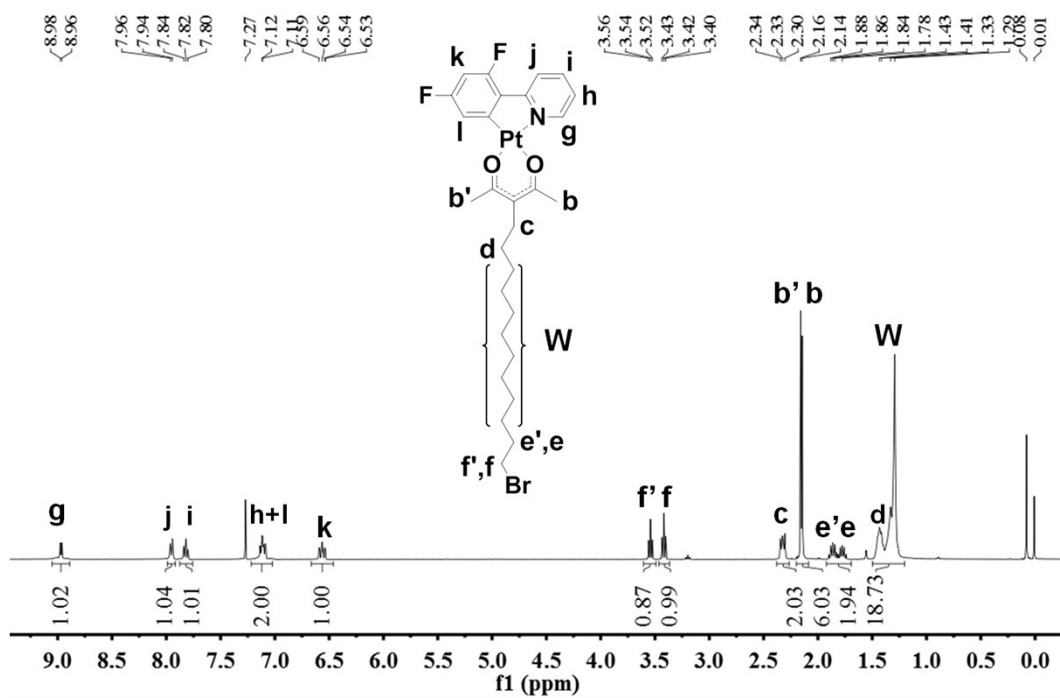

Figure S5 The <sup>1</sup>H NMR of complex 3

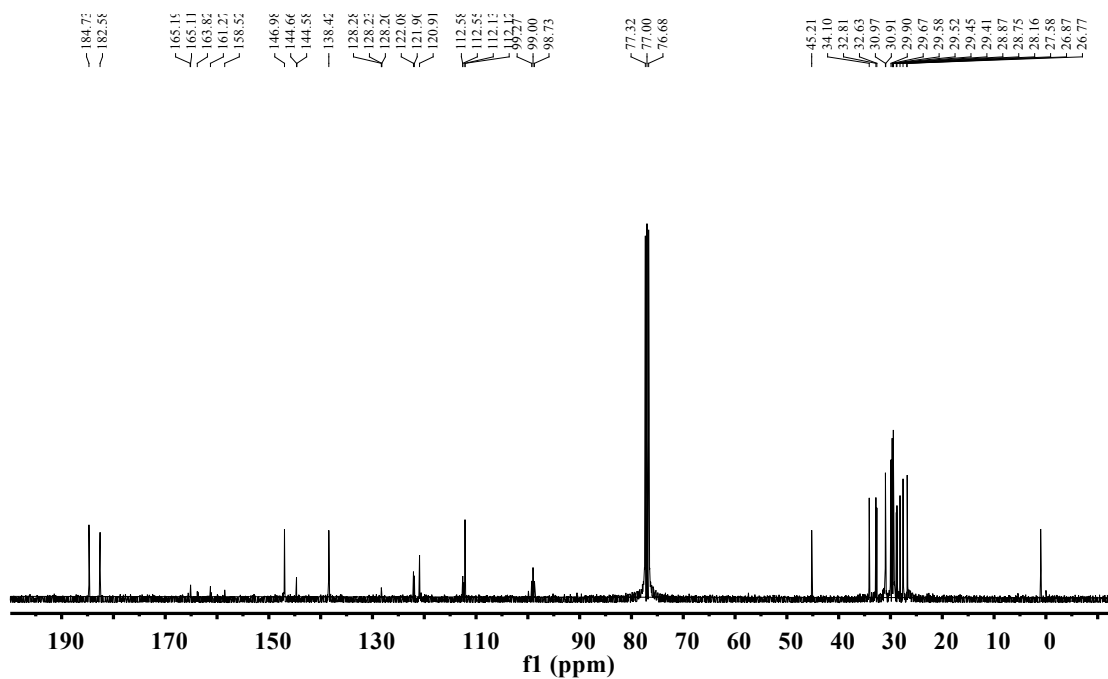

Figure S6 The <sup>13</sup>C NMR of complex 3

### Generic Display Report

|                      |                                  |                      |
|----------------------|----------------------------------|----------------------|
| <b>Analysis Info</b> | Acquisition Date                 | 5/10/2012 9:49:53 AM |
| Analysis Name        | D:\Data\201205\20120509zhenxy2.d |                      |
| Method               | POS_TuneLow_NaTFCa_100-1200.m    |                      |
| Sample Name          |                                  | Operator             |
| Comment              |                                  | BDAL@DE              |
|                      |                                  | Instrument           |
|                      |                                  | maXis 4G             |

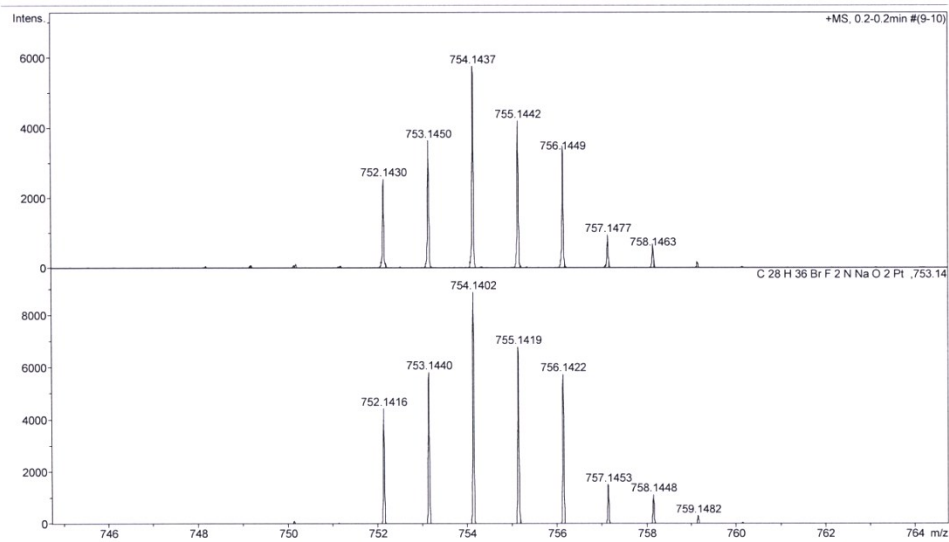

Bruker Compass DataAnalysis 4.0 printed: 10/24/2012 10:27:16 AM Page 1 of 1

Figure S7 The HR-ESI-MS of complex **3**

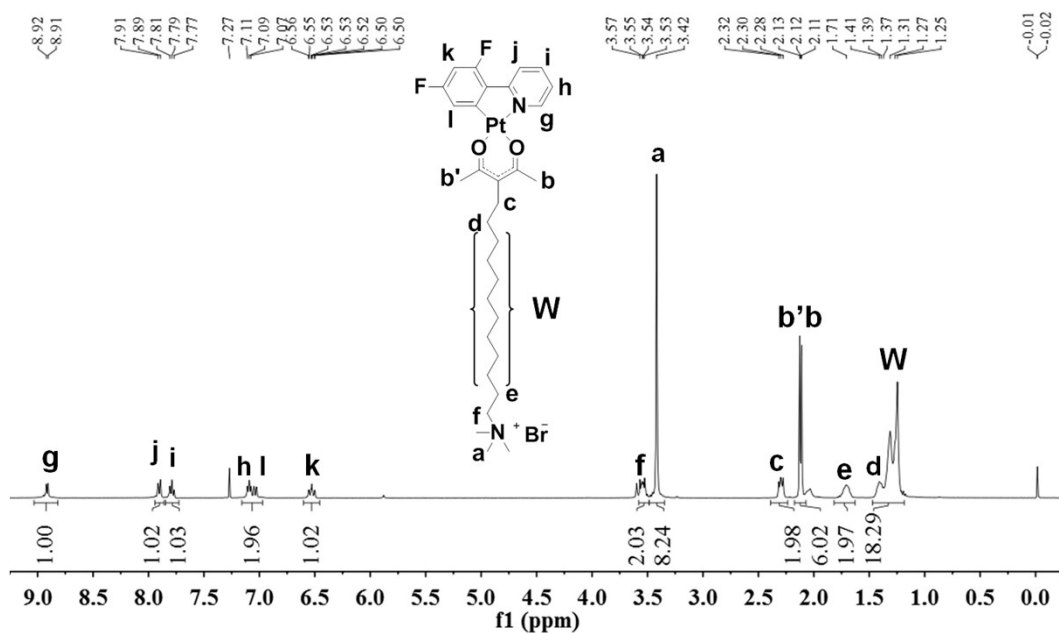

Figure S8 The <sup>1</sup>H NMR of FPtNC<sub>3</sub>

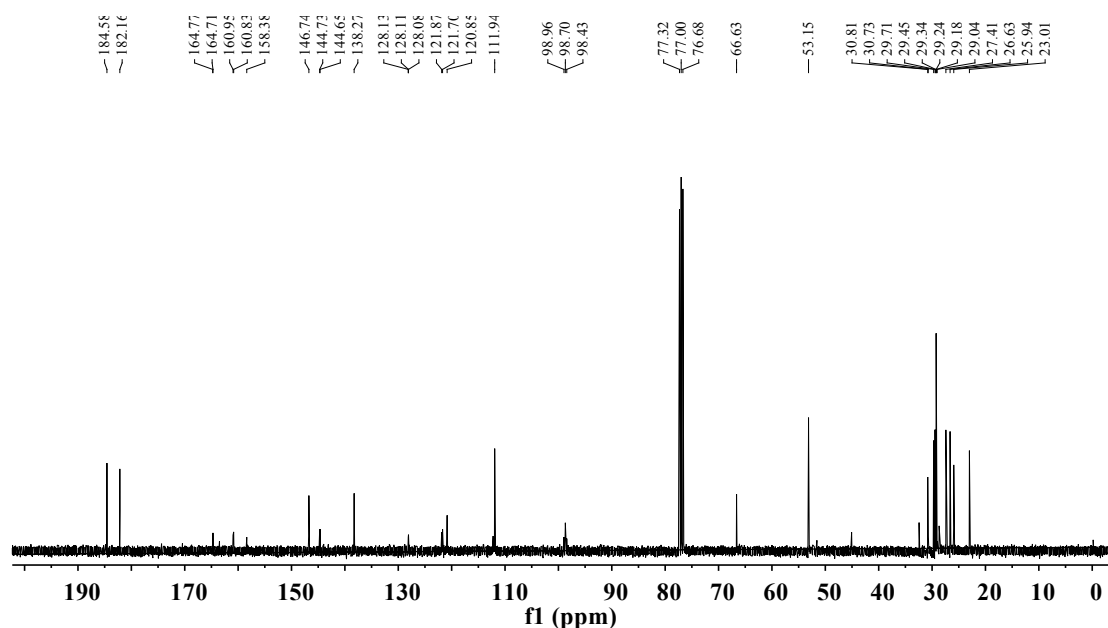

Figure S9 The  $^{13}\text{C}$  NMR of FPtNC<sub>3</sub>

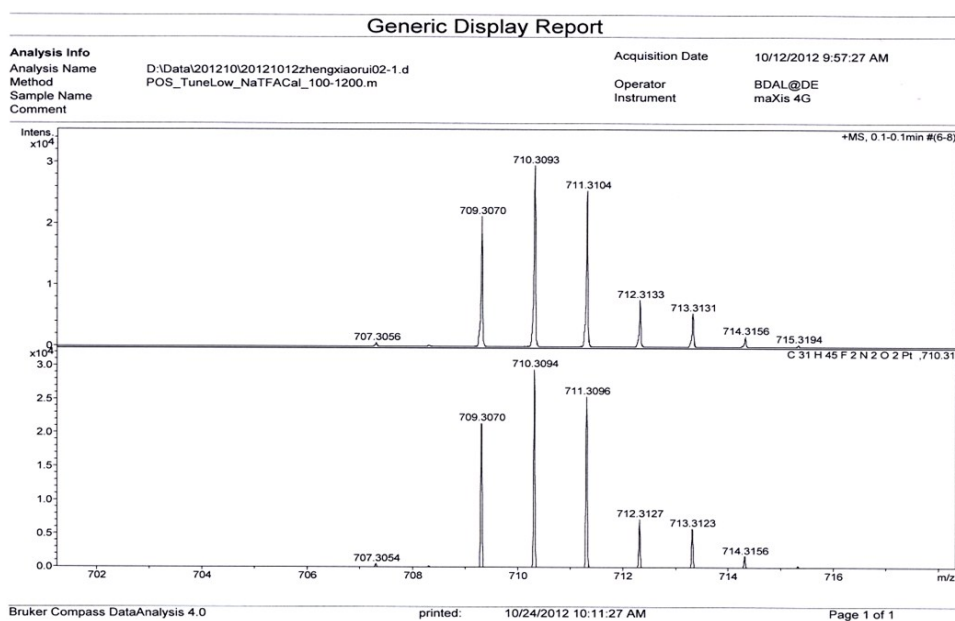

Figure S10 The HR-ESI-MS of FPtNC<sub>3</sub>

### 3. Self-assembly of FPtNC<sub>3</sub> and FPtNC<sub>3</sub>/DTAB mixtures in water

#### Solution Preparation

The concentration of FPtNC<sub>3</sub> aqueous solution was maintained at 0.2 mM. The samples of assemble systems were prepared by adding the DTAB aqueous solution to FPtNC<sub>3</sub> solution and aging for several months to get suspension solutions. Longer aging do not result in change in samples. Assemble and some measurements were repeated to ensure the reproducibility.

**Table 1** The molar ratio of FPtNC<sub>3</sub>/DTAB mixture systems and concentrations in detail.



| The molar ratio of FPtNC <sub>3</sub> /DTAB | The volume of FPtNC <sub>3</sub> (0.2 mM) / mL | The volume of DTAB |                   | Total concentration / mM | Total wt% | The percent of FPtNC <sub>3</sub> |
|---------------------------------------------|------------------------------------------------|--------------------|-------------------|--------------------------|-----------|-----------------------------------|
|                                             |                                                | (0.02 M) / $\mu$ L | (0.2 M) / $\mu$ L |                          |           |                                   |
| 1 : 0                                       | 4                                              | 0                  | 0                 | 0.20                     | 13.6      | 100%                              |
| 1 : 1                                       | 4                                              | 40                 | 0                 | 0.40                     | 18.0      | 50%                               |
| 1 : 2                                       | 4                                              | 80                 | 0                 | 0.59                     | 21.8      | 33.3%                             |
| 1 : 3                                       | 4                                              | 0                  | 12                | 0.80                     | 25.5      | 25%                               |
| 1 : 4                                       | 4                                              | 0                  | 16                | 0.99                     | 28.8      | 20%                               |
| 1 : 5                                       | 4                                              | 0                  | 20                | 1.19                     | 31.6      | 16.7%                             |
| 1 : 6                                       | 4                                              | 0                  | 24                | 1.39                     | 34.4      | 14.3%                             |
| 1 : 7                                       | 4                                              | 0                  | 28                | 1.59                     | 37.0      | 12.5%                             |
| 1 : 8                                       | 4                                              | 0                  | 32                | 1.79                     | 39.2      | 11.1%                             |
| 1 : 9                                       | 4                                              | 0                  | 36                | 1.98                     | 41.4      | 10.0%                             |
| 1 : 10                                      | 4                                              | 0                  | 40                | 2.18                     | 43.3      | 9.09%                             |
| 1 : 20                                      | 4                                              | 0                  | 80                | 4.11                     | 57.7      | 4.76%                             |
| 1 : 30                                      | 4                                              | 0                  | 120               | 5.96                     | 66.1      | 3.23%                             |
| 1 : 40                                      | 4                                              | 0                  | 160               | 7.88                     | 71.6      | 2.44%                             |
| 1 : 50                                      | 4                                              | 0                  | 200               | 9.71                     | 75.5      | 1.96%                             |
| 1 : 60                                      | 4                                              | 0                  | 240               | 11.5                     | 78.4      | 1.64%                             |
| 1 : 70                                      | 4                                              | 0                  | 280               | 13.3                     | 80.7      | 1.41%                             |
| 1 : 80                                      | 4                                              | 0                  | 320               | 15.0                     | 82.3      | 1.23%                             |
| 1 : 90                                      | 4                                              | 0                  | 360               | 16.7                     | 84.0      | 1.10%                             |
| 1 : 100                                     | 4                                              | 0                  | 400               | 18.4                     | 85.2      | 0.99%                             |

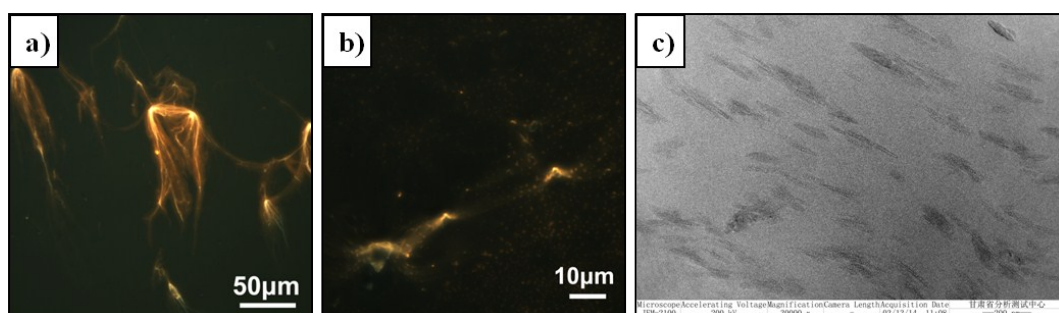

Figure S11 Fluorescent micrograph of FPtNC<sub>3</sub> in aqueous solution(a) and in dry state(b), (c)TEM image of FPtNC<sub>3</sub> in dry state on carbon casted copper grid.

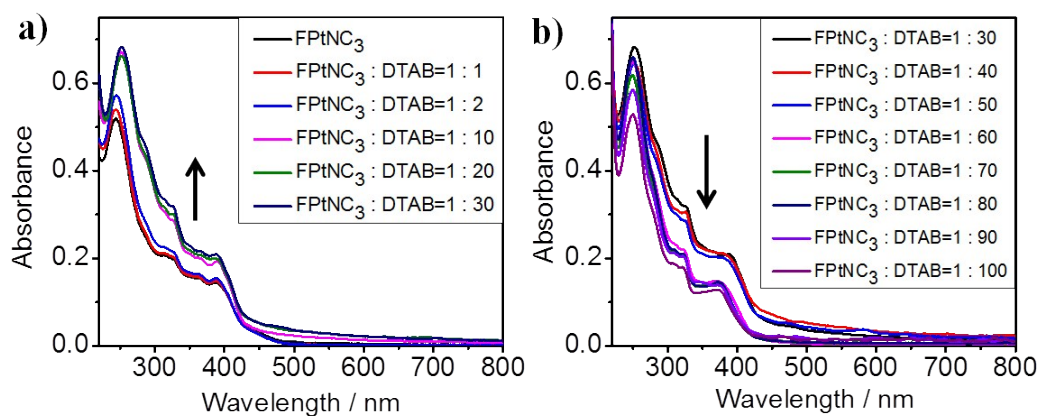

Figure S12 UV-Vis spectrum of FPtNC<sub>3</sub>/DTAB mixture systems.

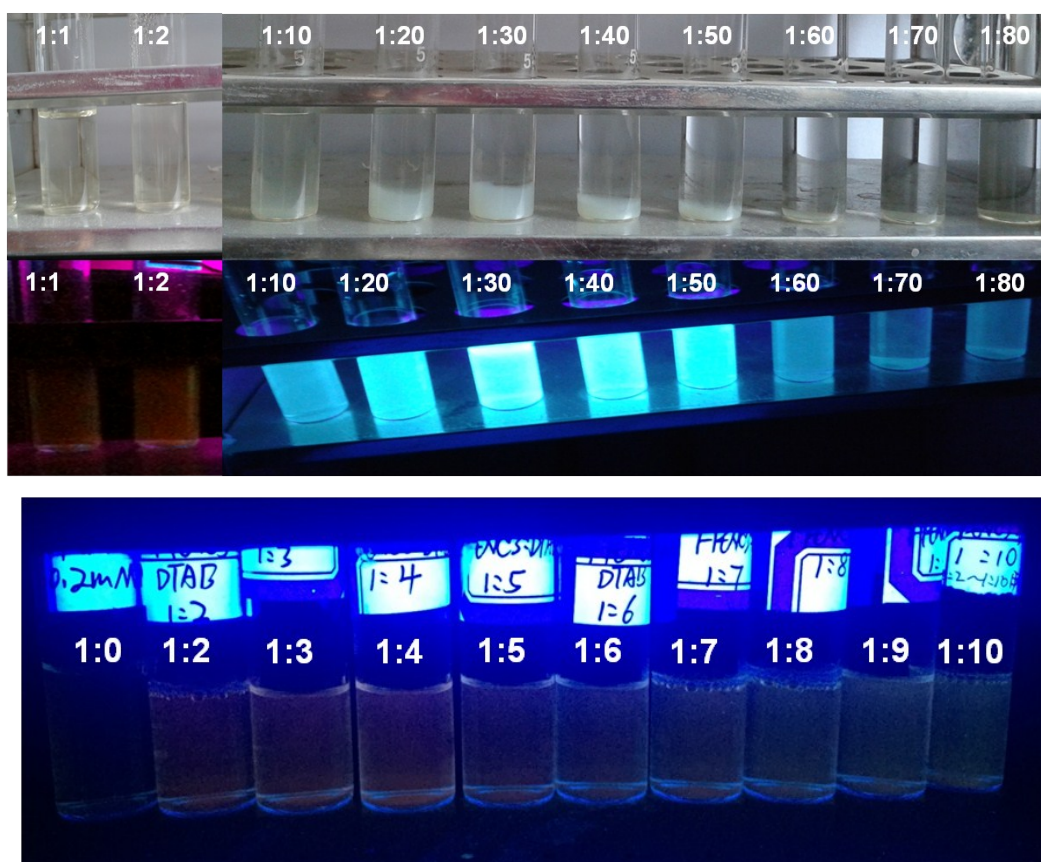

Figure S13 Photographic images of mixture systems excited at 365 nm wave length with a UV lamp.

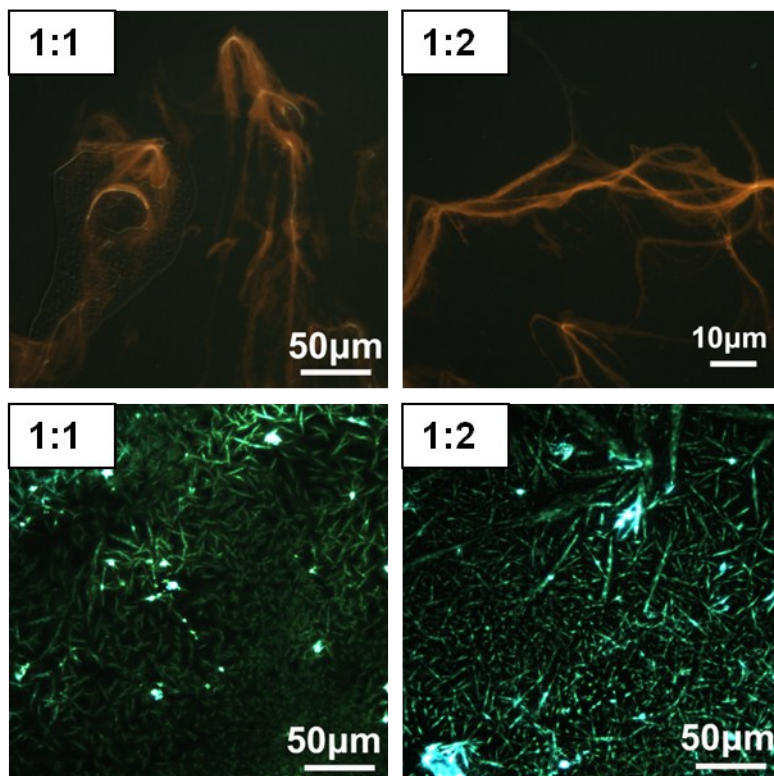

Figure S14 Fluorescent micrograph of FPtNC<sub>3</sub>/DTAB mixture systems with molar ratio at 1:1 and 1:2 in aqueous solution(up) and in dry state(down).

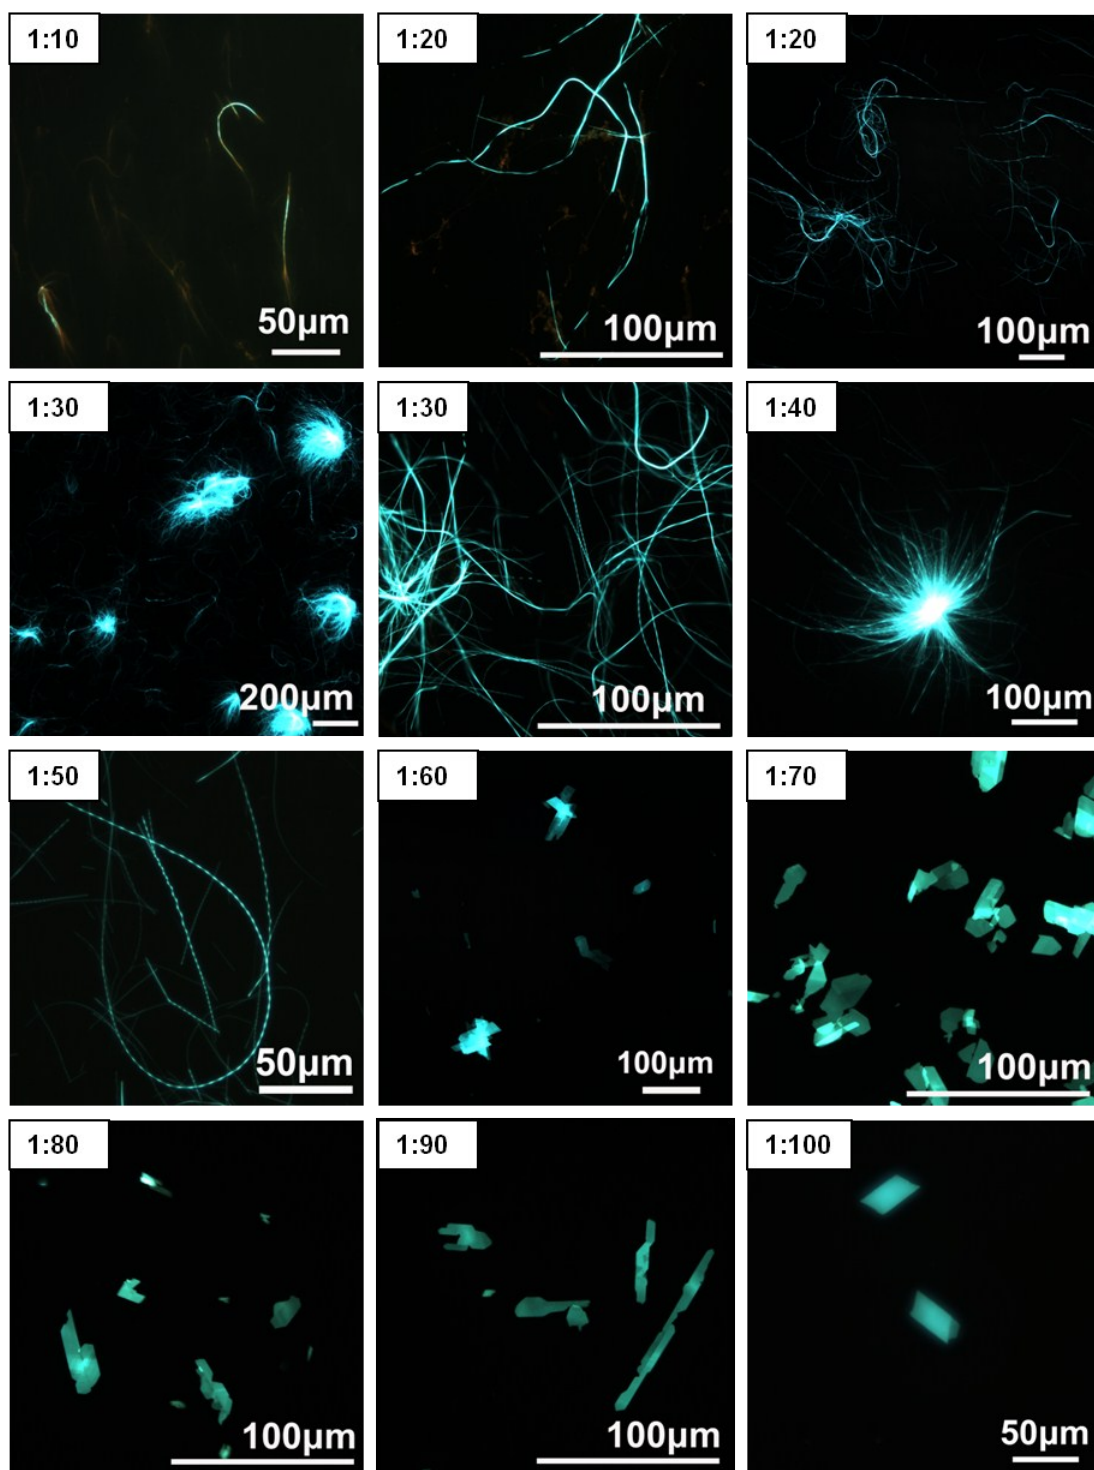

Figure S15 Fluorescent micrograph of FPtNC<sub>3</sub>/DTAB mixture systems in aqueous medium.

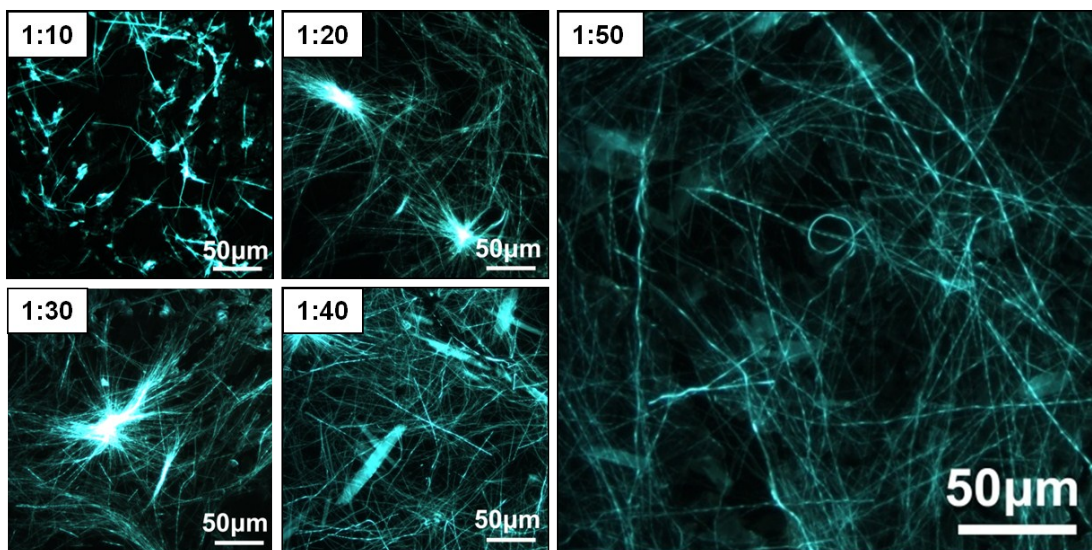

Figure S16 Fluorescent micrograph of FPTnC<sub>3</sub>/DTAB mixture systems in dry state.

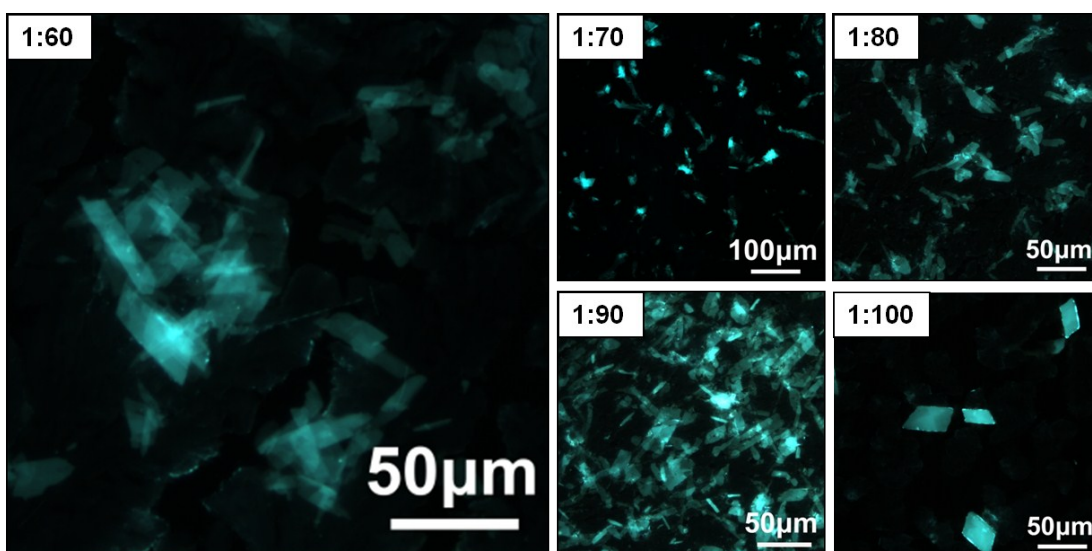

Figure S17 Fluorescent micrograph of FPTnC<sub>3</sub>/DTAB mixture systems in dry state.

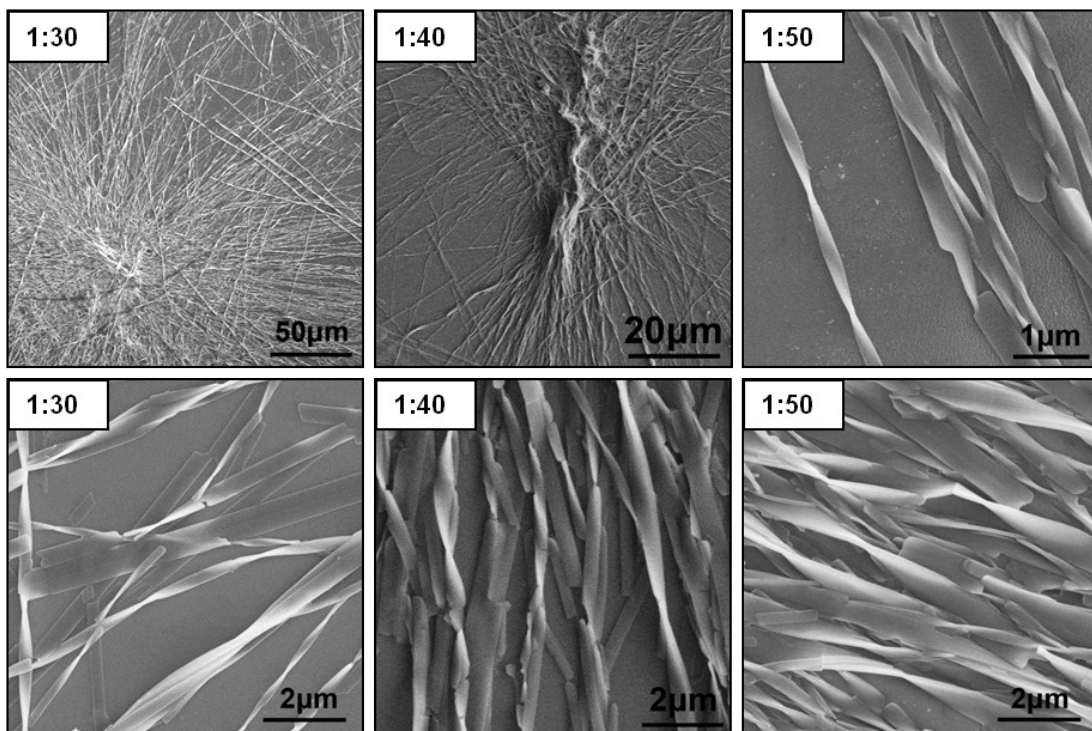

Figure S18 SEM images of FPtNC<sub>3</sub>/DTAB mixture systems.

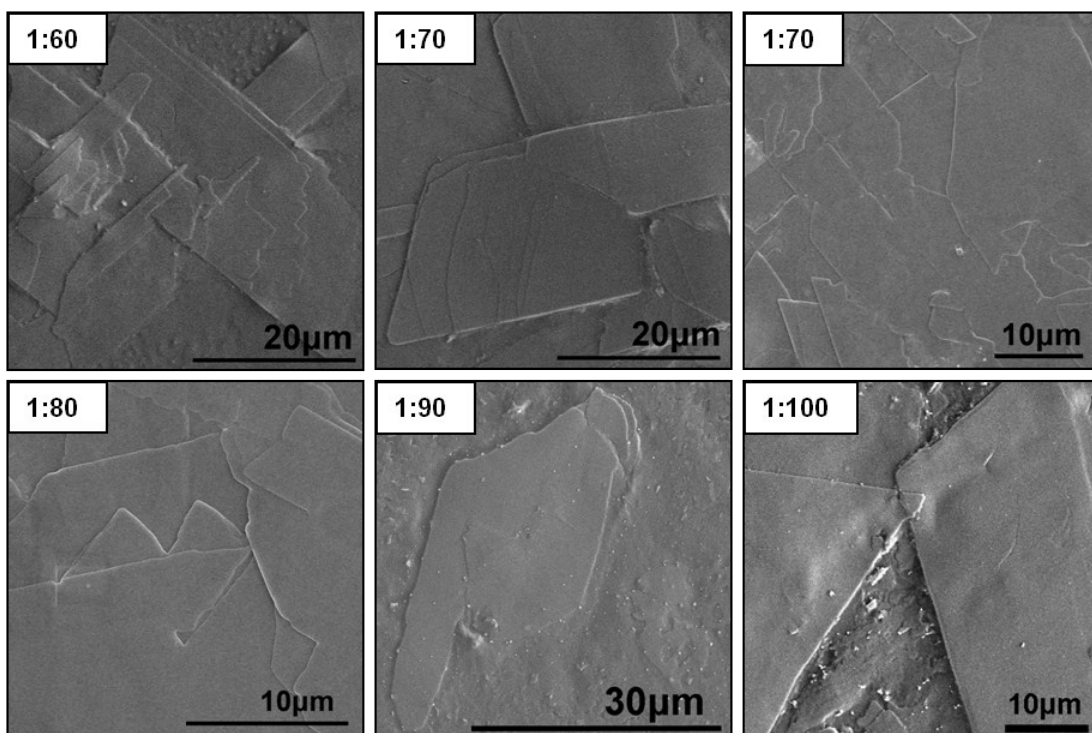

Figure 19 SEM images of FPtNC<sub>3</sub>/DTAB mixture system.

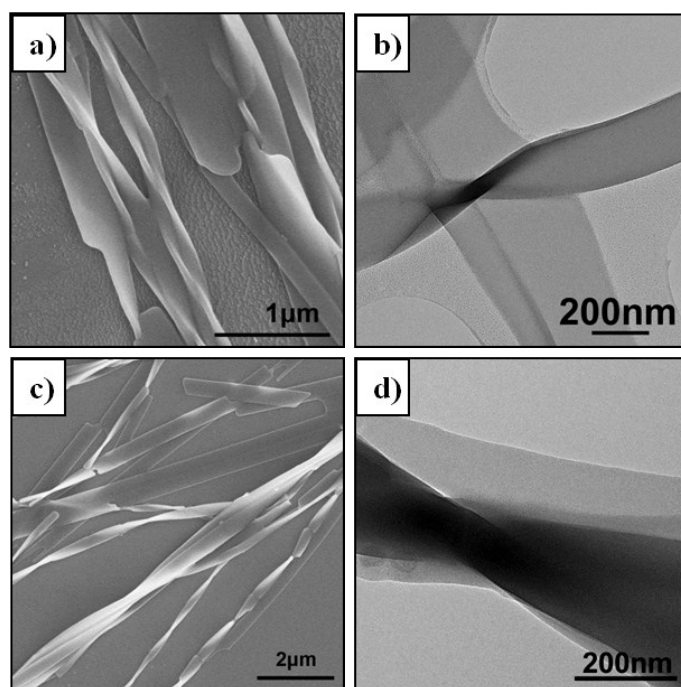

Figure S20 SEM images of FPtNC<sub>3</sub>/DTAB mixture system with left hand(a, b), right hand(c, d) helices and a few straight ribbons.

References:

- 1 J. Brooks, Y. Babayan, S. Lamansky, P. I. Djurovich, I. Tsyba, R. Bau and M. E. Thompson, *Inorg. Chem.*, 2002, **41**, 3055.
